# Supplementary material for: High-performance amorphous carbon–graphene nanocomposite anode for lithium-ion batteries
Source: Royal Society of Chemistry journal article supplement (doi:10.1039/c3ra46566g), 2014-01-01
Supplement: c3ra46566g1.pdf [file c3ra46566g1.pdf]

## Supporting Information

### High-performance amorphous carbon/graphene nanocomposite anode for lithium-ion batteries

Jingxia Qiu, Chao Lai\*, Sheng Li, Shanqing Zhang\*

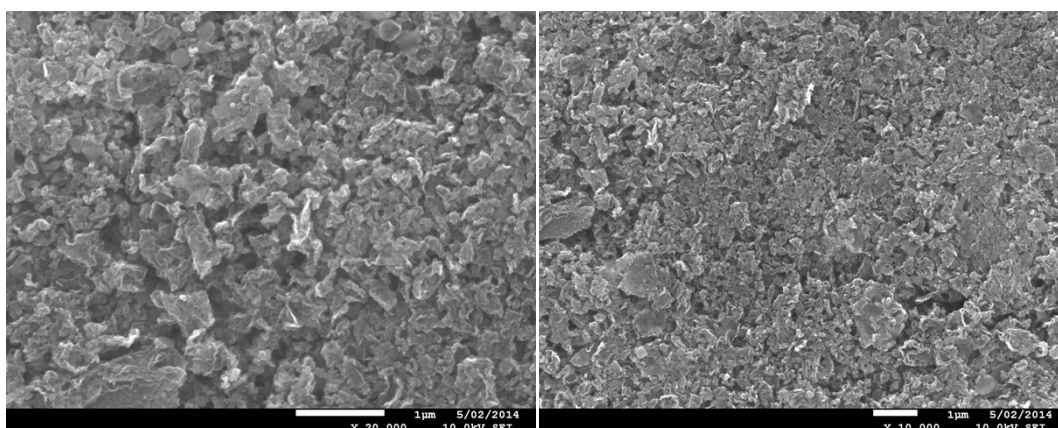

(a)

(b)

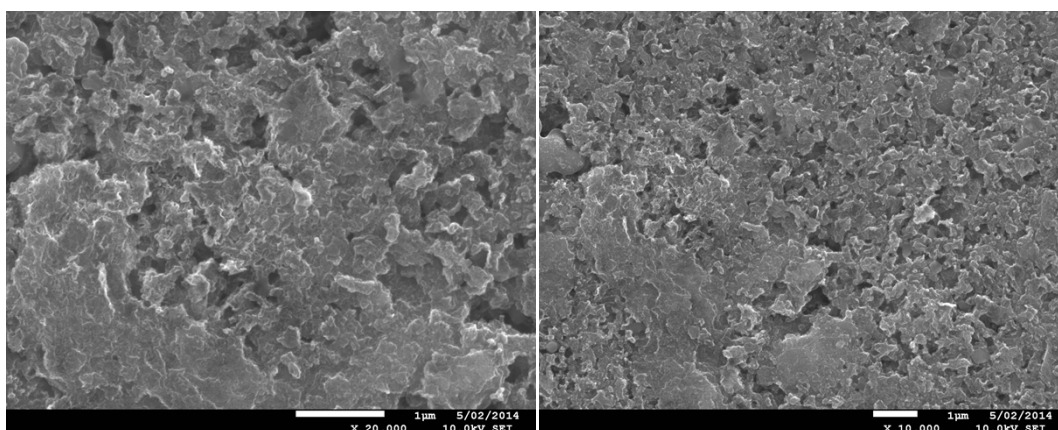

(c)

(d)

SEM images of the AC/G electrodes before (a, b) and after (c, d) the electrochemical tests.
